# Supplementary material for: Biological Impact of Exposure to Extremely Fine-Grained Volcanic Ash
Source: Hindawi journal article supplement (doi:10.1155/2018/7543859), 2018-07-16
Supplement: f1 [file 7543859.f1.xls]

## Sheet: Results table
Bruker Nano GmbH, Germany
	Quantax
Quantification results
Norm. mass percent (%)
Date:	7/13/2017
Spectrum	Na	Mg	Al	Si	P	S	K	Ca	Ti	Mn	Fe
PIC 1.spx	6.80349	0.911589	18.5123	48.6114	1.58775	1.07681	7.18722	7.60788	1.0664	0.0733041	6.56178
PIC 2.spx	6.55969	2.69056	21.1299	38.0544	0.819026	0.588368	3.84623	4.26049	0.573438	0.858318	20.6195
PIC 3.spx	3.52809	2.98553	12.6075	35.9759	0.347647	0.105453	3.56794	13.998	1.85105	0.374163	24.6586
PIC 4.spx	4.72742	0	19.9338	48.1925	0.62711	0.962581	8.42726	10.8035	0.961089	0.0940748	5.27067
PIC 5.spx	7.50652	3.01161	20.2436	43.7214	2.32647	1.11614	2.96754	10.5204	1.16512	0.0402184	7.381
PIC 6.spx	4.44498	2.68982	13.4646	54.6149	2.73069	2.40623	4.27584	6.49287	0.745277	0.10041	8.03441
PIC 7.spx	3.82487	0.239894	19.6609	41.1738	0.0521724	0.230355	2.35866	29.0512	0.194525	0.146745	3.06684
PIC 8.spx	3.63887	1.47712	28.364	28.1916	6.91671	13.4574	2.39468	8.9353	0.774338	0.0688246	5.78125
PIC 9.spx	7.24887	0	20.1523	52.2717	1.02558	0.683343	12.8598	3.94738	0.379075	0	1.43195
PIC 10.spx	3.97407	0.0851514	16.3168	52.7133	0.976464	0.585736	8.45389	7.40621	1.63991	0.112027	7.73638
PIC 11.spx	4.62602	4.95264	6.82446	6.29994	0.954931	0.52741	0.380942	0.490664	6.13468	0.443278	68.365
PIC 12.spx	5.39391	0.750517	20.2492	48.3189	1.74869	1.07046	4.81027	10.6037	0.937896	0.0374911	6.07895
PIC 13.spx	4.29297	0	18.16	42.4374	0	0.195111	4.39072	18.0876	1.59683	0.147708	10.6916
PIC 14.spx	7.77407	1.49946	17.2251	48.5503	1.50262	2.47592	6.26891	5.97584	1.23558	0.116127	7.37606
PIC 15.spx	3.52383	14.649	10.2961	40.6677	0.943555	0.669551	1.80386	4.59521	0.496926	0.674525	21.6798
PIC 16.spx	7.45746	1.37	17.8574	52.3806	2.21295	2.05695	3.96989	5.58255	1.13952	0.0387206	5.93406
PIC 17.spx	3.91927	1.94596	6.80844	6.91145	0.723518	0.997066	0.678314	1.79528	75.0564	0.0266267	1.13772
PIC 18.spx	0.344135	4.85513	7.70692	35.6896	0.193524	7.76072	3.33851	8.47848	2.88642	0.167002	28.5795
PIC 19.spx	2.89688	0.267995	9.71554	24.4442	0.327683	0.384829	6.20049	6.95908	8.56168	0.549638	39.692
PIC 20.spx	7.42632	0.913774	19.5982	49.3562	1.79811	1.09714	4.99965	8.29973	1.01807	0.0212305	5.47155
PIC 21.spx	1.73957	0	14.2044	42.4278	0	0	9.77478	12.4899	2.92804	0.368096	16.0675
PIC 22.spx	7.71492	1.09208	17.6292	50.9253	2.80129	1.36688	7.18468	4.24896	1.85823	0.053204	5.12521
PIC 23.spx	7.67025	4.58717	19.8505	43.1047	1.7554	0.958807	3.05469	10.3394	0.712408	0	7.96666
PIC 24.spx	6.28401	1.99727	15.3854	41.7454	1.3596	0.480143	7.28142	8.69722	2.58835	0.214253	13.9669
PIC 25.spx	4.11173	1.9449	17.219	49.3143	1.67301	0.961328	6.59703	7.63549	1.46338	0.168888	8.91091
PIC 26.spx	8.31407	0.741766	20.2101	50.0873	2.37229	1.60312	7.79279	5.57306	0.609693	0.0432482	2.65259
PIC 27.spx	10.0677	2.21658	9.60571	18.6033	3.4299	9.67359	9.66418	22.2806	3.91677	0.0552683	10.4863
PIC 28.spx	5.20891	1.12866	17.3176	51.3551	1.18607	0.66587	6.50265	6.88132	1.39219	0.147812	8.21388
PIC 29.spx	8.31428	1.42599	18.1413	44.0793	2.38159	4.47537	4.52829	8.0392	1.01645	0.066562	7.53169
PIC 30.spx	4.11757	0.952336	18.4519	50.2579	0.860268	0.535833	6.15849	8.20922	1.44495	0.118962	8.89255
PIC 31.spx	8.05975	1.40015	20.0202	48.3061	1.91738	1.22851	4.66644	7.78124	0.915704	0.0214195	5.68316
PIC 32.spx	3.19305	0.433767	23.9862	47.9081	0.504877	0.708378	2.12756	4.52477	12.3626	0.0165476	4.23414
PIC 33.spx	0	0	2.41034	33.537	0	24.0501	6.0012	19.1778	4.50535	0.0412049	10.277
PIC 34.spx	3.27895	1.07823	17.0688	53.4243	1.39356	0.786999	7.80393	5.79768	1.40159	0.120935	7.84508
PIC 35.spx	0.502428	0.620898	16.9717	52.0424	1.54626	0.854306	7.91029	7.86797	1.77515	0.180549	9.72809
PIC 36.spx	3.40139	0.407012	23.4787	43.3819	1.47178	0.959874	2.43284	20.5448	0.52534	0.025258	3.3711
PIC 37.spx	6.13259	2.67477	7.74655	11.3662	2.1813	1.10777	0.681213	1.43279	0.12178	0.337828	66.2173
PIC 38.spx	3.458	2.03818	16.052	45.4101	0.716	0.941088	5.48793	13.7646	1.539	0.162739	10.4303
PIC 39.spx	1.76186	1.36174	12.0757	34.8084	4.15719	2.17164	4.82503	26.7662	1.45746	0.130416	10.4844
PIC 40.spx	5.90281	0.357091	24.438	37.1472	1.37612	8.43477	3.77466	10.71	0.73118	0.0109186	7.11727
PIC 41.spx	2.09793	0.58854	15.8429	48.4935	0	0	8.32436	10.1277	2.14565	0.268588	12.1107
PIC 42.spx	8.38361	1.13071	19.6244	42.4317	0.942542	0.764987	3.46294	8.67082	1.6195	0.131672	12.837
PIC 43.spx	6.69965	1.62823	16.6345	47.6649	2.63501	2.8432	6.27652	6.70028	1.24317	0.117231	7.55726
PIC 44.spx	10.2232	0.446565	22.4556	47.8817	1.67151	1.07605	3.59801	9.51209	0.399844	0.0142768	2.72114
PIC 45.spx	1.61246	0	17.8344	45.2677	0	2.09563	3.59158	24.0416	1.13843	0.062395	4.35583
PIC 46.spx	6.92635	2.31314	16.0344	50.6254	2.17526	1.3667	7.03369	5.00126	1.19888	0.133188	7.19168
PIC 47.spx	1.80673	16.0341	5.92078	35.7686	1.10456	0.82882	0.295545	26.2449	0.926036	0.268843	10.801
PIC 48.spx	7.50413	0.890888	25.8667	43.2003	1.69729	1.11467	1.46313	15.3058	0.118519	0.0422646	2.79629
PIC 49.spx	12.13	0	10.6554	23.8785	7.13278	23.8055	2.23443	15.4118	0.279568	0.404813	4.06725
PIC 50.spx	4.16207	0.570329	16.2134	49.2325	1.39678	1.44917	7.60739	7.43839	1.67767	0.177185	10.0751
PIC 51.spx	4.10166	2.358	17.8321	51.8361	2.29518	1.49513	5.74675	5.71396	1.15197	0.119285	7.34984
PIC 52.spx	0	0	8.3036	39.6101	0	16.9423	6.6736	14.6185	1.71557	0.114793	12.0215
PIC 53.spx	7.75289	0.0657597	26.5813	45.19	1.24751	0.799504	0.916415	16.0143	0.0803544	0	1.35196
PIC 54.spx	6.91599	1.10034	18.5172	50.8604	0.99417	0.716716	6.08961	6.77548	1.112	0.0633218	6.85477
PIC 55.spx	3.2909	0.116625	16.3373	48.3332	0.118668	0.141819	9.59198	10.2309	2.18766	0.148753	9.50221
PIC 56.spx	5.68843	0	21.6744	55.2305	0.50389	0.380287	6.23316	8.17222	0.328017	0.0395953	1.74946
PIC 57.spx	4.73574	3.55657	12.1984	35.7724	2.84314	0.205029	4.56663	11.535	2.02088	0.290426	22.2758
PIC 58.spx	8.02645	4.18413	16.7664	46.4683	1.72221	0.986177	4.08528	8.03004	0.51954	0.274951	8.93655
PIC 59.spx	6.57773	1.65225	16.8666	48.3693	2.24449	1.81814	6.46354	6.57984	1.27059	0.0996314	8.05787
PIC 60.spx	0	0	9.81433	38.2041	2.61962	20.6558	7.19155	8.2609	2.12352	0.31402	10.8161
PIC 61.spx	6.27646	1.62566	24.864	40.8746	0.631612	0.289821	0.914432	18.2746	0.505648	0.0463489	5.69681
PIC 62.spx	3.53714	1.63986	17.6737	54.1512	1.88279	1.19074	5.9751	6.22449	1.23478	0.0553013	6.43495
PIC 63.spx	0.525254	0	15.1443	49.2366	0.38627	0.199301	10.1396	9.17273	2.29192	0.317064	12.587
PIC 64.spx	4.07061	3.1256	23.707	43.7208	3.03063	2.46475	2.49873	7.27393	0.912332	0.0352851	9.16038
PIC 65.spx	8.93537	0	18.1968	44.4605	1.00692	7.6661	3.12949	10.3223	0.799677	0.12095	5.36179
PIC 66.spx	4.13568	1.04888	17.9416	53.8002	1.66399	0.99634	6.75187	5.91054	1.18559	0.114777	6.45061
PIC 67.spx	8.0871	0.317837	25.612	45.5265	1.34428	0.816162	1.42707	14.4889	0.212258	0	2.16789
PIC 68.spx	4.94344	1.92557	18.3831	51.6477	2.02335	1.32421	6.11205	5.96351	1.01433	0.116865	6.54595
PIC 69.spx	8.52422	0.676202	24.8978	42.8227	2.42017	1.78566	1.81101	14.4942	0.129678	0.0357236	2.40258
PIC 70.spx	0	0	14.4123	50.2438	0	0.253928	9.6631	10.2973	2.22266	0.303765	12.6032
PIC 71.spx	8.72355	4.08008	14.0172	37.7608	5.34919	8.01979	3.72573	9.13583	0.664742	0.236902	8.28623
PIC 72.spx	5.88925	1.85419	17.7389	50.4359	1.65254	0.990849	6.34976	6.27025	1.24167	0.0977151	7.47894
PIC 73.spx	6.35294	1.70889	19.0027	49.0915	2.00956	1.21575	5.28447	7.2826	1.03766	0.0432368	6.9707
PIC 74.spx	3.90578	1.83307	17.9982	53.1927	2.13773	1.3409	6.4546	5.00919	1.06517	0.104577	6.95806
PIC 75.spx	1.33105	1.25184	18.4197	52.6794	1.3565	0.450477	4.68475	10.0705	1.33885	0.200718	8.21621
PIC 76.spx	4.21084	21.8944	10.3667	35.3756	1.73929	1.24827	2.02139	2.53872	0.366177	0.51568	19.723
PIC 77.spx	7.13083	0	20.0102	51.7155	1.47539	1.22501	7.32368	6.85411	0.774889	0.00152794	3.48879
PIC 78.spx	0	0	13.7915	44.581	0	0	10.7805	16.5971	2.52136	0.270233	11.4583
PIC 79.spx	5.50987	0.287016	15.2468	59.5079	1.48039	1.4045	4.44927	7.45518	0.576383	0.023082	4.05956
PIC 80.spx	8.81467	2.69015	18.853	43.9188	1.56083	0.803324	4.71071	6.43917	0.760867	0.100336	11.3481
PIC 81.spx	4.85568	1.68568	16.2631	49.187	1.40398	2.13638	6.25784	6.79395	1.26543	0.275103	9.87581
PIC 82.spx	5.4037	3.28429	17.4621	49.077	2.17165	1.68366	5.07885	6.17591	0.977466	0.130089	8.55527
PIC 83.spx	3.13365	0	23.5129	44.2096	0.0501667	0.947624	2.63325	21.5796	0.587312	0.0440327	3.30182
PIC 84.spx	2.44255	0.262314	18.1729	28.9375	0	0.0559719	1.86517	14.6483	0.42745	0.239481	32.9484
PIC 85.spx	8.76326	1.48782	20.0199	45.2391	2.69044	2.87865	4.16153	8.59862	0.667802	0.0283991	5.46452
PIC 86.spx	5.4962	2.19648	18.8375	49.5719	2.17719	1.23219	5.51636	6.14338	1.15418	0.147543	7.52709
PIC 87.spx	7.06356	0.959757	27.9779	41.5456	2.05333	1.36787	0.936921	16.3379	0.279677	0.0170822	1.46034
PIC 88.spx	6.52857	0.19324	28.3798	42.7103	1.41096	0.829036	0.528325	18.1228	0.159689	0.0172221	1.11999
PIC 89.spx	5.56106	0.225678	19.4376	51.9977	1.3749	0.775131	5.78211	8.38812	1.09166	0.0280752	5.33792
PIC 90.spx	3.35047	1.73894	16.7805	35.4251	0.889233	0.525997	1.54274	4.3255	1.49958	0.866595	33.0553
PIC 91.spx	3.93083	0.324206	15.0075	46.2799	0.437472	3.42698	7.5621	7.45295	1.65555	0.157836	13.7647
PIC 92.spx	1.90163	0	14.6713	49.5602	2.81493	5.07362	7.71476	8.66122	1.53227	0.253493	7.8165
PIC 93.spx	7.86832	1.90802	18.0852	48.329	2.33301	1.57776	5.70537	6.49698	0.983588	0.0569245	6.65586
PIC 94.spx	3.45195	0	17.4477	48.9785	0.770366	1.51733	7.5973	9.89479	1.67421	0.0769968	8.59084
PIC 95.spx	6.27939	2.23031	17.7892	49.4029	1.96268	1.1867	5.71892	5.73528	1.28306	0.115643	8.29598
PIC 96.spx	4.22715	0	17.3727	40.8837	0.08479	0.427206	7.35615	14.7589	2.31153	0.128113	12.4498
PIC 97.spx	3.35388	1.75433	18.3352	51.3889	1.07565	0.520579	5.07702	6.75034	2.74087	0.145842	8.85743
PIC 98.spx	4.85379	0.665802	14.8352	33.9963	0	0.731015	8.5209	21.7707	1.99736	0.207371	12.4215
PIC 99.spx	3.31281	0	18.894	47.6845	0	1.08861	4.64678	13.7312	1.45459	0.273691	8.91385
PIC 100.spx	6.35951	2.29315	14.4894	32.2023	0.884709	0.398473	3.76461	4.40479	13.9815	0.342088	20.8795
Spectrum	Na	Mg	Al	Si	P	S	K	Ca	Ti	Mn	Fe
Mean value:	5.06824	1.7556	17.2911	43.8348	1.51981	2.41964	5.11051	10.0189	2.33519	0.157515	10.4887
Sigma:	2.59618	3.08352	4.94506	9.67463	1.26446	4.47867	2.62564	5.72169	7.6226	0.16474	10.6492
Sigma mean:	0.259618	0.308352	0.494506	0.967463	0.126446	0.447867	0.262564	0.572169	0.76226	0.016474	1.06492
Si/Al	2.5351
Mg/Al	0.101532
Mg/Si	0.0400503
K/Al	0.295557
Al/Mg	9.84914
Fe/Mg	5.97444
Si/Mg	24.9686
Si/Fe	4.17923
Mg/K	0.343527
Al/Ti
Na/al	0.293112
